# Supplementary material for: A new LaCo0.71(1)V0.29(1)O2.97(3) perovskite containing vanadium in octahedral sites: synthesis and structural and magnetic characterization
Source: Royal Society of Chemistry journal article supplement (doi:10.1039/c4dt03858d), 2015-01-01
Supplement: c4dt03858d1.pdf [file c4dt03858d1.pdf]

†Electronic Supplementary Information (ESI) available:

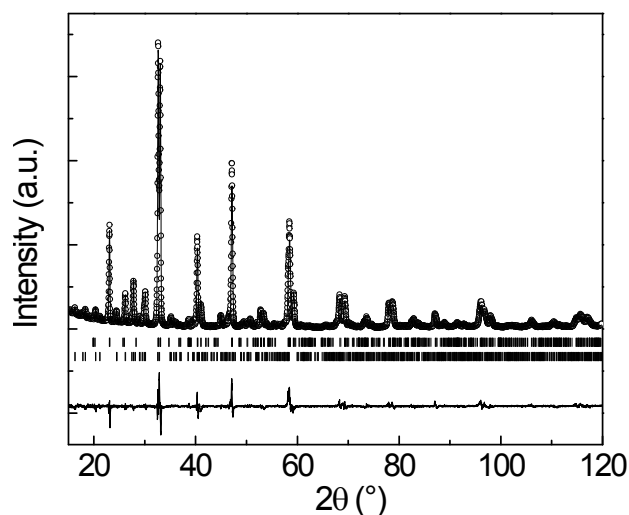

**Figure S1:** Rietveld refinement of the PXRD pattern at room temperature for a sample with stoichiometry  $\text{La}_3\text{Co}_2\text{VO}_9$  synthesized by sol gel method. Main phase:  $\text{LaCo}_{0.73}\text{V}_{0.27}\text{O}_3$ ; impurity phase:  $\text{LaVO}_4$ .

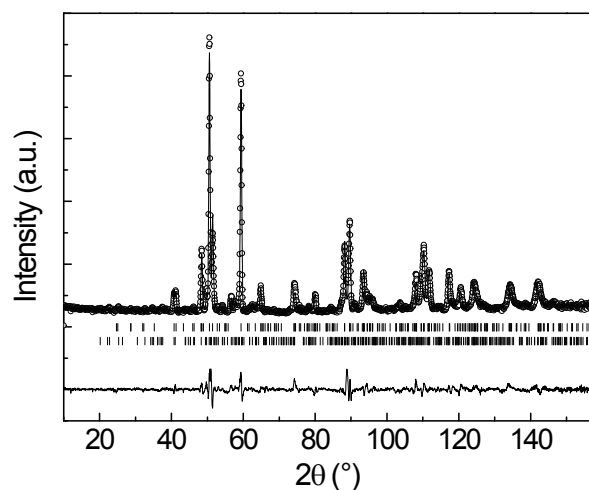

**Figure S2:** Rietveld refinement of PND pattern at room temperature for a sample with stoichiometry  $\text{La}_3\text{Co}_2\text{VO}_9$  synthesized by sol gel method. Main phase:  $\text{LaCo}_{0.73}\text{V}_{0.27}\text{O}_3$ ; impurity phase:  $\text{LaVO}_4$ .

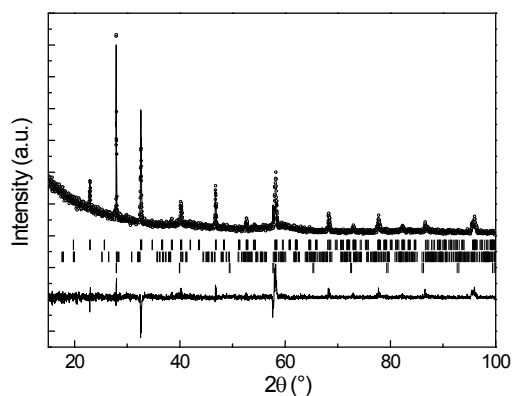

**Figure S3:** Rietveld analysis of PXRD pattern for the thermogravimetric solid residue. Vertical marks correspond to the position of the allowed Bragg reflections. Upper marks:  $\text{LaCoO}_3$  (61.3(2)%); Middle marks:  $\text{V}_2\text{O}_5$  (13.5(2)%);

Lower marks:  $\text{La}_2\text{O}_3$  (25.2(1)%). Due to the high preferential orientation produced by sample preparation on the zero background sample holder (Silicon single crystal), the percentages are not close to the theoretical ones (47,5% for  $\text{LaCoO}_3$ , 7,5% for  $\text{V}_2\text{O}_5$  and 45% for  $\text{La}_2\text{O}_3$ ), but all the reflections can be explained with the proposed compounds.

Structural information derived from the crystal structure refinement of  $\text{LaCo}_{0.71(1)}\text{V}_{0.29(1)}\text{O}_{2.97(3)}$  has been deposited at the ICSD Fachinformationszentrum Karlsruhe (FIZ) (E-mail: [CrysDATA@FIZ.Karlsruhe.DE](mailto:CrysDATA@FIZ.Karlsruhe.DE)), with ICSD file number 428836 (for  $\text{LaCo}_{0.71(1)}\text{V}_{0.29(1)}\text{O}_{2.97(3)}$  at 300 K).

See DOI: [10.1039/b000000x/](https://doi.org/10.1039/b000000x/)
